# Supplementary material for: In situ observations of adsorbed microgel particles
Source: Royal Society of Chemistry journal article supplement (doi:10.1039/b613981g), 2006-12-20
Supplement: b613981g.pdf [file b613981g.pdf]

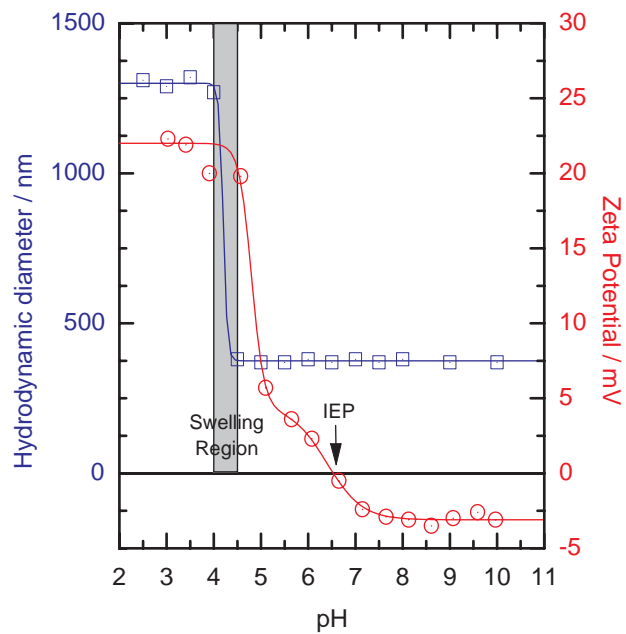

Fig. S1. Bulk hydrodynamic diameter and zeta potential for the PEGMA stabilised P2VP microgel. The swelling region is between pH 4.0 and 4.5 and isoelectric point at pH 6.5. Solid lines are a guide to the eye only.
